# Supplementary material for: Root traits and belowground herbivores relate to plant–soil feedback variation among congeners
Source: PubMed Central journal article supplement (PMC6450911; doi:10.1038/s41467-019-09615-x), 2019-04-05
Supplement: 41467_2019_9615_MOESM1_ESM.pdf [file 41467_2019_9615_MOESM1_ESM.pdf]

## **Supplementary information**

**Root traits and belowground herbivores relate to plant-soil**

**feedback variation among congeners**

**Wilschut et al.**

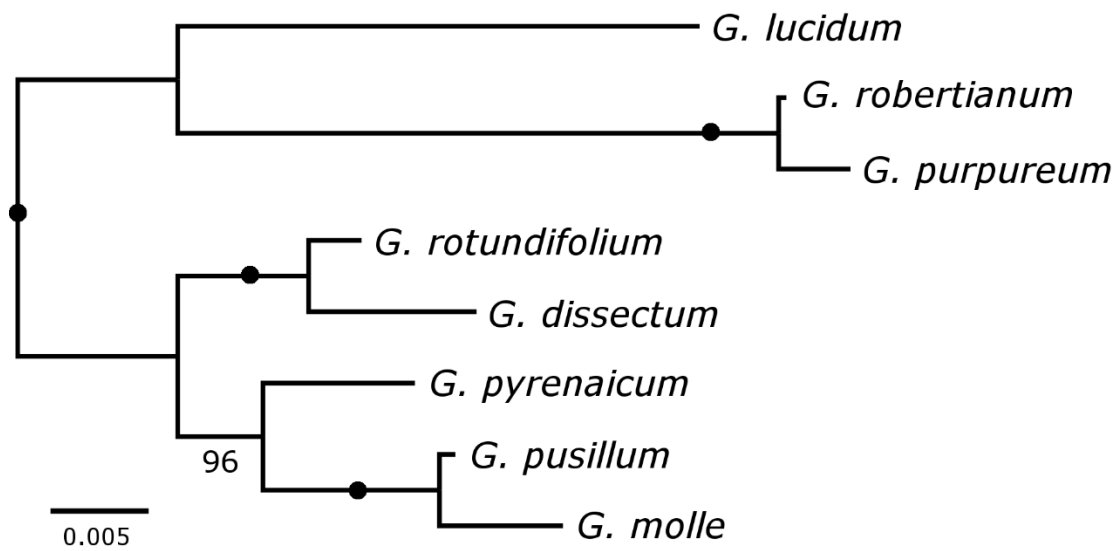

**Supplementary Figure 1: Phylogeny of eight *Geranium* species.** Phylogenetic relationships among native plant species *G. dissectum*, *G. molle*, *G. pusillum* and *G. robertianum*, and range-expanding plant species *G. lucidum*, *G. pyrenaicum*, *G. purpureum* and *G. rotundifolium* (ROT), based on DNA-regions *rbcl*, the *trnL* gene and the *trnL-trnF* intergeneric spacer. Bootstrap support is visualized with black dots (100% support) or numbers indicating the percentage support.

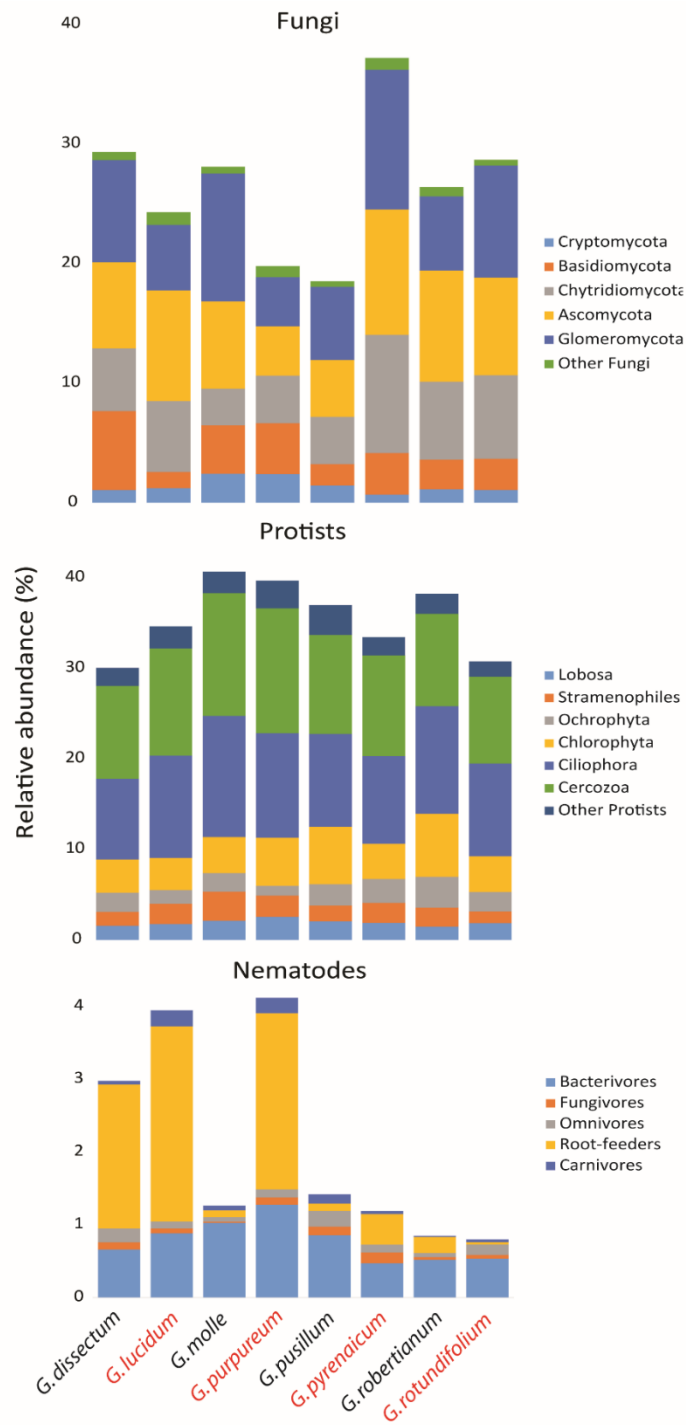

**Supplementary Figure 2: Relative abundances eukaryotic groups.** Average relative abundances (% 18S rRNA gene reads) of taxonomic groups of fungi and protists and functional groups of nematodes in the rhizospheres of native (black) and range-expanding (red) *Geranium* species.



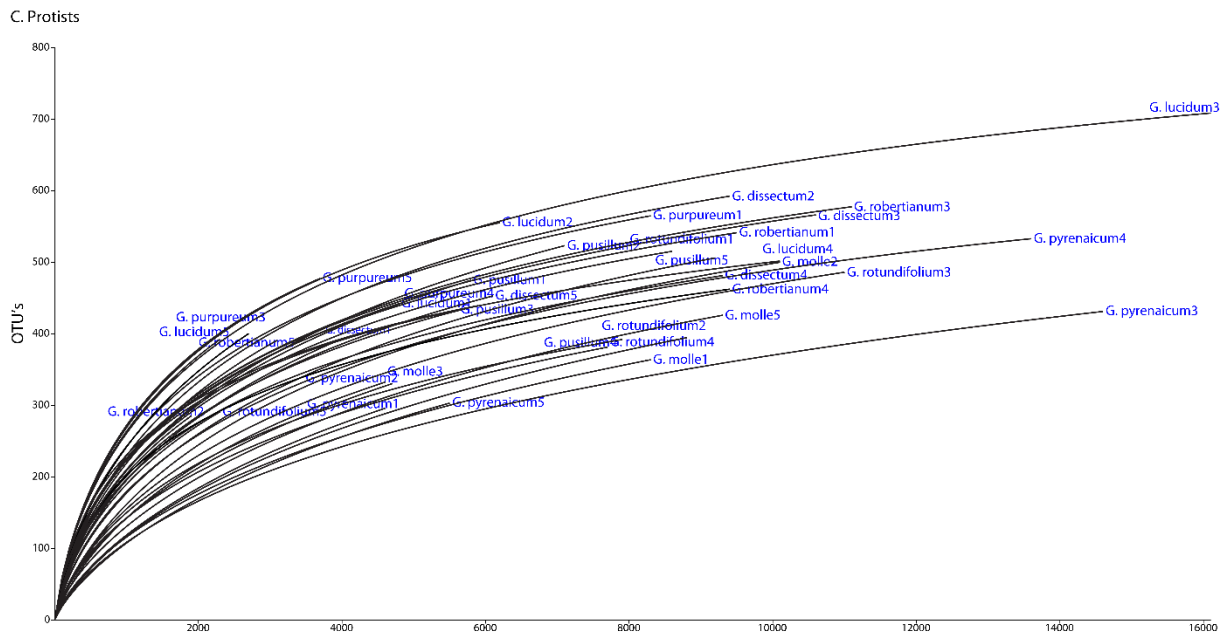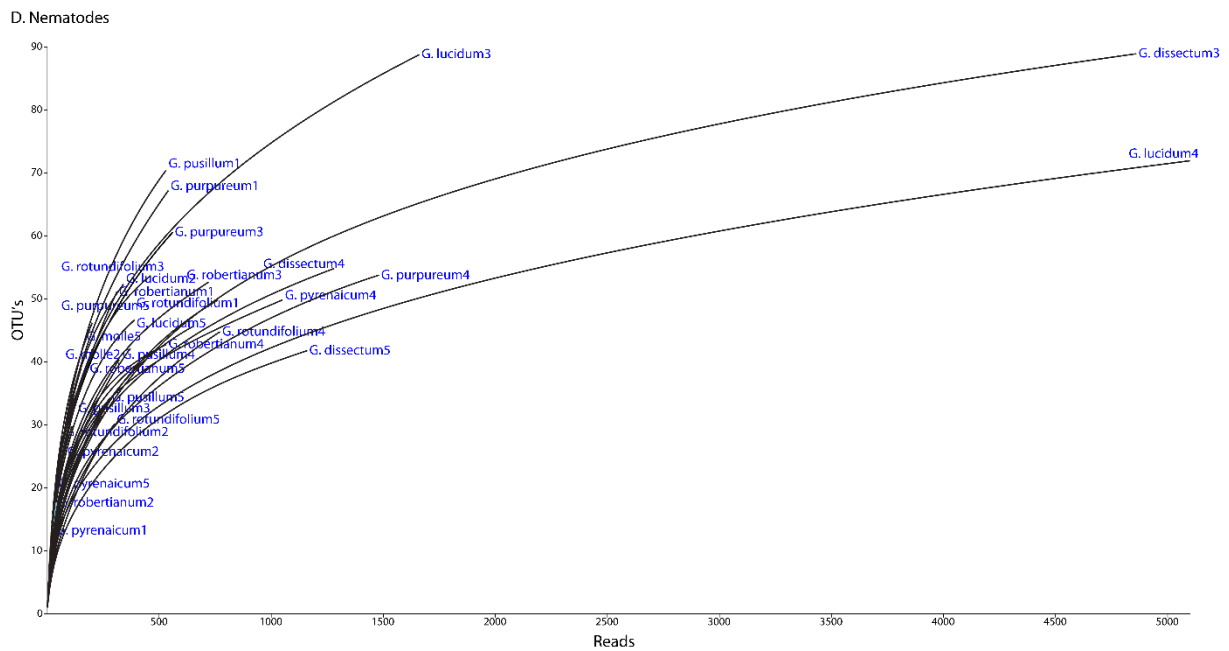

**Supplementary Figure 3: Rarefaction curves of major rhizosphere groups.** Per-sample relationship between number of reads and OTU-diversity for Bacteria (A), Fungi (B), Protists (C) and Nematodes (D).

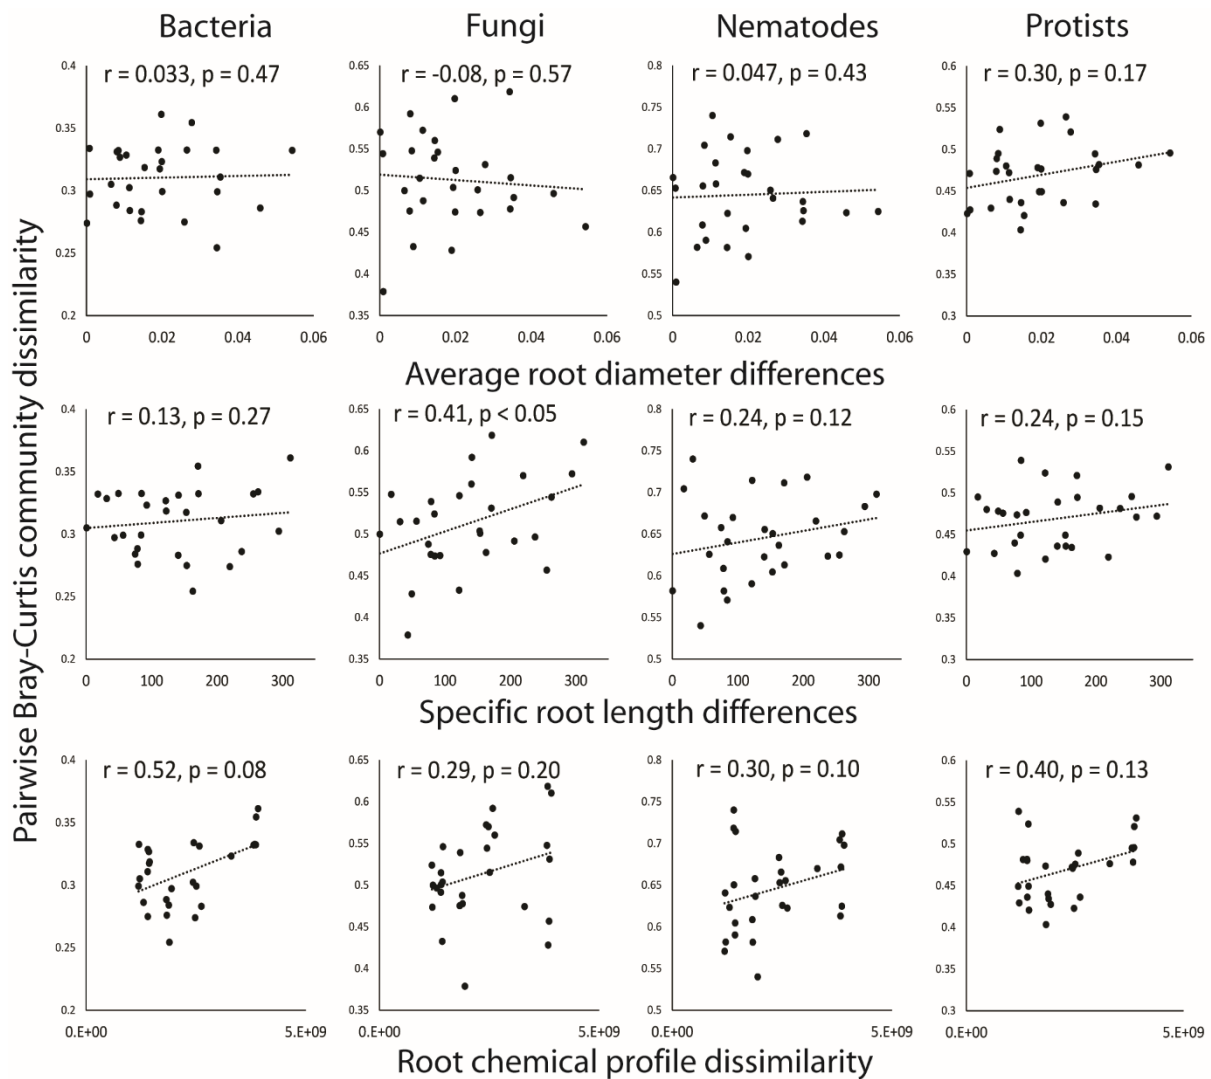

**Supplementary Figure 4: Trait-community linkages.** Scatterplots of between-species root trait dissimilarities (root chemical profile, specific root length and average root diameter) and Bray-Curtis community dissimilarities (Bacteria, Fungi, Nematode, Protists; also see Fig. 2).  $R^2$  and p-values based on Mantel tests are shown.

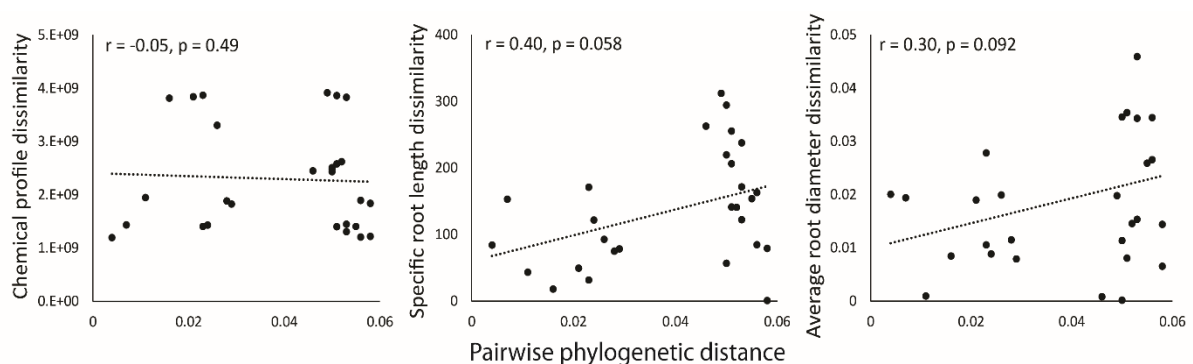

**Supplementary Figure 5: Phylogenetic distances and trait dissimilarities.** Scatterplots of pairwise phylogenetic distance and root trait dissimilarity (root chemical profile, specific root length and average root diameter).  $R^2$  and p-values based on Mantel tests are shown.

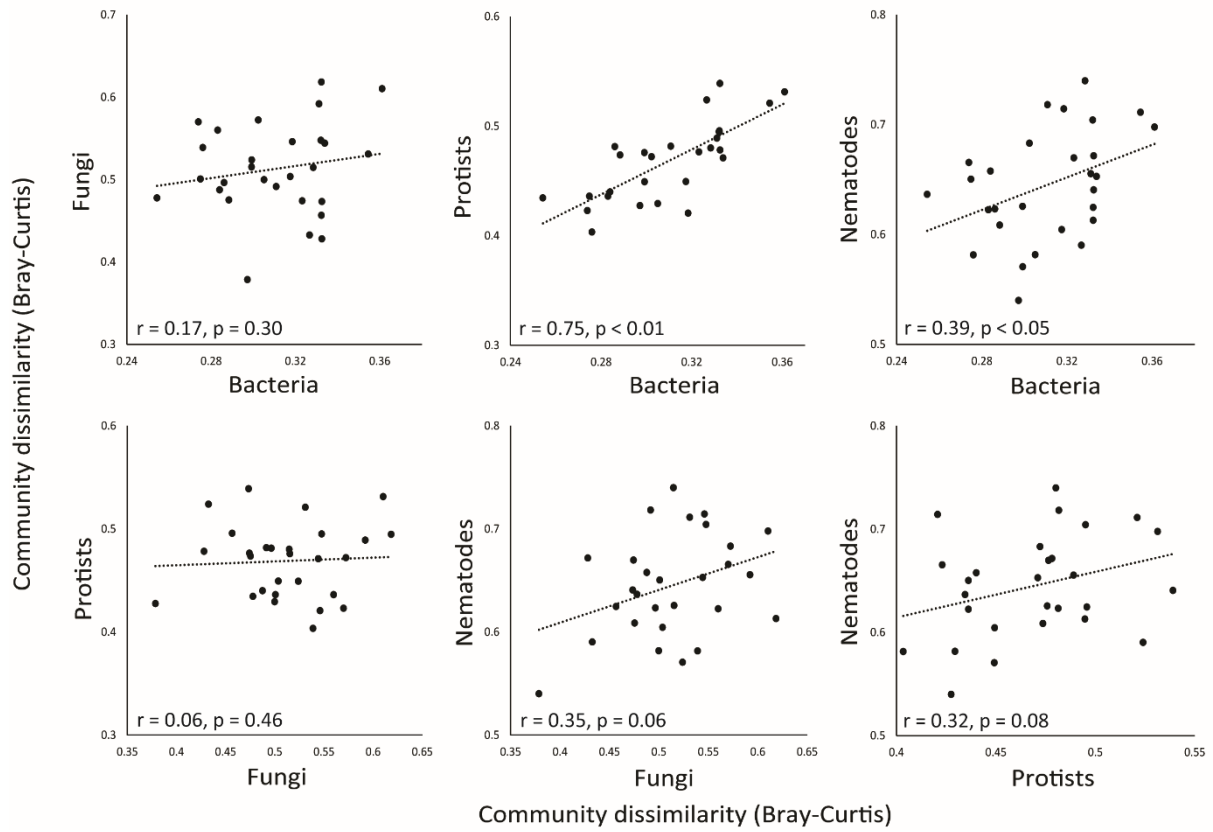

**Supplementary Figure 6: Linkages between major rhizosphere groups.** Scatterplots between between-species Bray-Curtis community dissimilarities of Bacteria, Fungi, Nematodes and Protists; also see Fig. 2).  $R^2$  and p-values based on Mantel tests are shown.

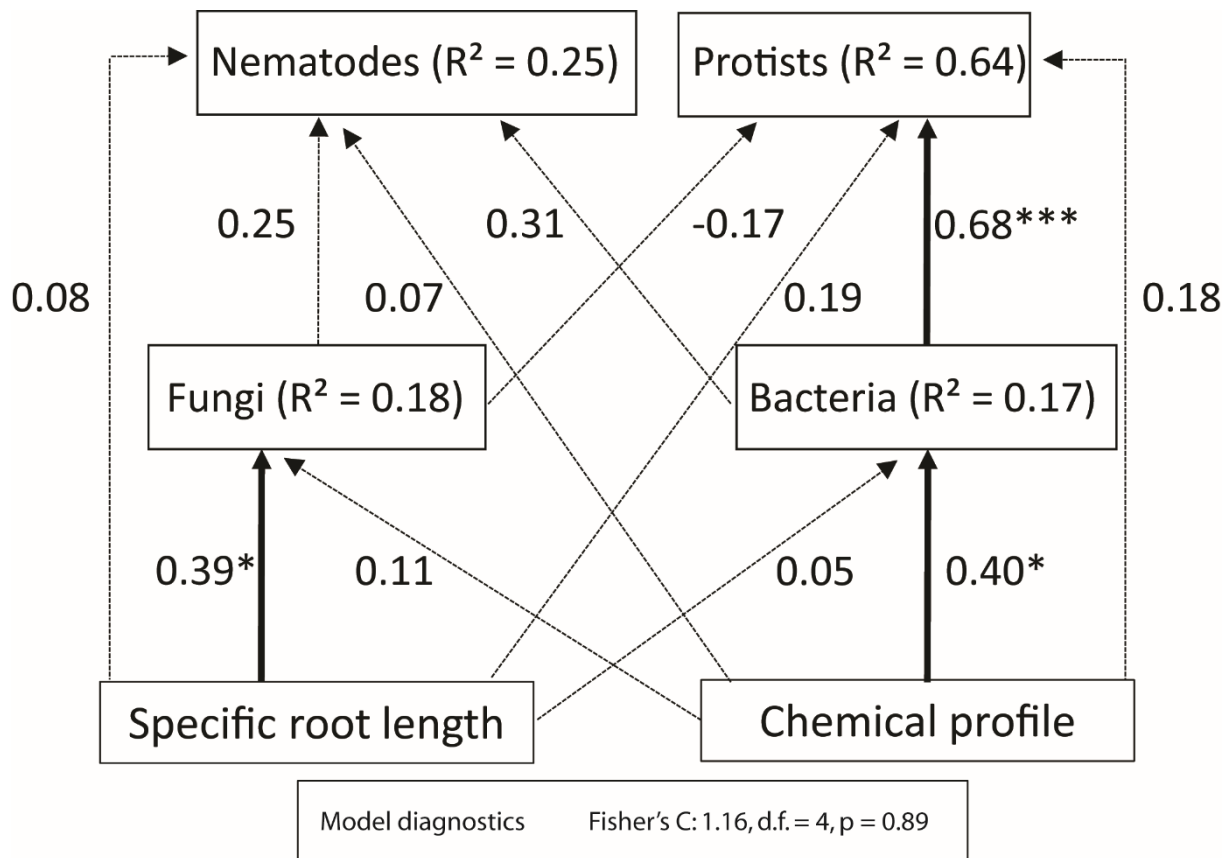

**Supplementary Figure 7: Structural equation model on root trait-community linkages.** Arrows represent the predictive effects of between-species dissimilarities in root traits (Root chemical profile, Specific root length) on between-species Bray-Curtis dissimilarity in rhizosphere community groups (Bacteria, Fungi, Protists, Nematodes), and predictive effects of between-species dissimilarities in fungal and bacterial community composition on dissimilarities in nematode and protist community composition. Bold and dashed arrows respectively represent significant and non-significant predictive relationships. Model estimates of predictor strength, and explained variation ( $R^2$ ) of the community groups are shown.

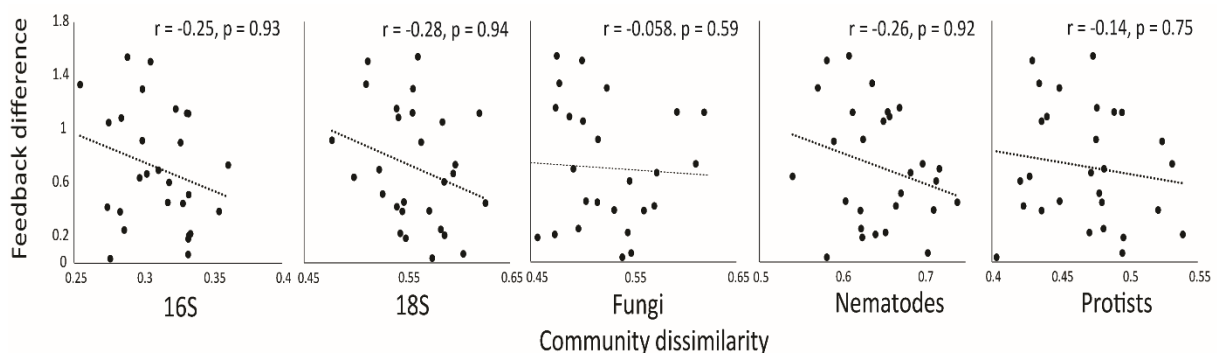

**Supplementary Figure 8: Community dissimilarity and plant-soil feedback variation.** Scatterplots between Bray-Curtis community dissimilarities (16S rRNA gene, 18S rRNA gene, Fungi, Nematode, Protists) and plant-soil feedback differences show no positive association between community dissimilarity of different *Geranium* species and their pairwise differences in plant-soil feedback. Pearson correlation coefficients  $r$  and  $p$ -values of Mantel-tests are shown.



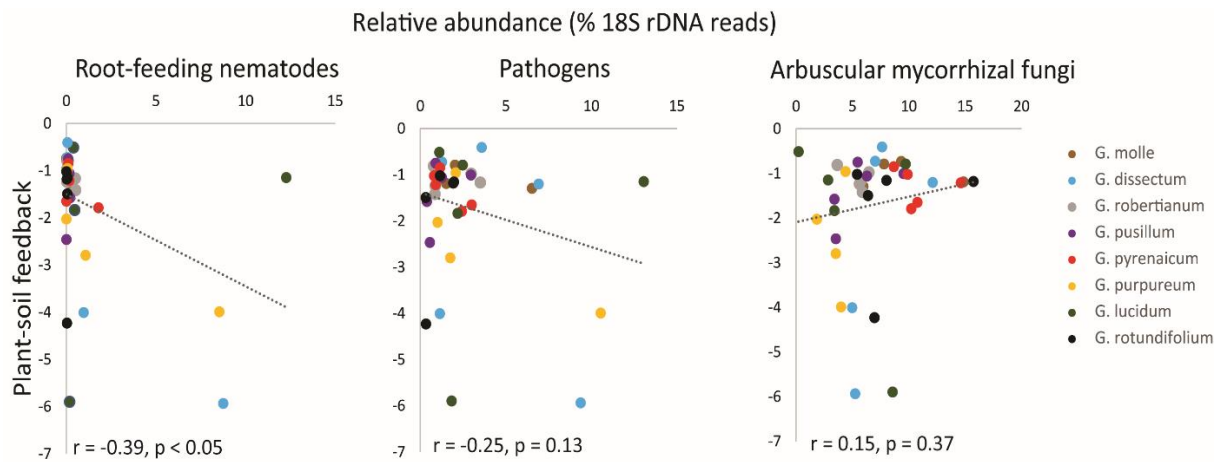

**Supplementary Figure 9: Predictors of plant-soil feedback.** Correlations between individual plant-soil feedback replicates ( $\ln(\text{biomass}_{\text{conditioned}}/\text{biomass}_{\text{control}})$ ) of eight *Geranium* species (5 replicates per species; see Fig. 4 for averaged values) and the relative abundances (% 18S rRNA gene reads) of root-feeding nematodes, plant pathogens (see Methods) and arbuscular mycorrhizal fungi (AMF) in the conditioned soils. Pearson correlation coefficients  $r$  and  $p$ -values of Pearson correlation tests are shown.

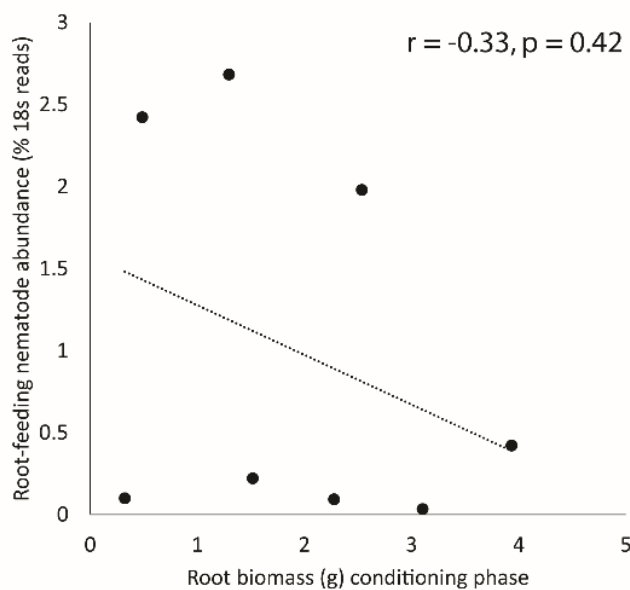

**Supplementary Figure 10: Root-feeding nematode accumulation and root biomass in conditioning phase.** Scatterplot between average plant root biomass and the relative abundance of root-feeding nematodes at the end of the soil conditioning phase shows that high relative abundances of root-feeding nematodes are not associated with high root biomass of plants in the conditioning phase. Pearson correlation coefficient and  $p$ -value of the Pearson correlation test are shown.

**Supplementary Table 1: Predictors of rhizosphere community composition.** Plant species and plant origin effects on the composition of the components of the *Geranium* rhizosphere communities, and results of Mantel test on the correlations between pairwise phylogenetic distances and pairwise community dissimilarity among the eight *Geranium* species.

|                       | Plant species    |                       | Plant origin     |                         | Phylogeny       |
|-----------------------|------------------|-----------------------|------------------|-------------------------|-----------------|
|                       | Expl. Var. (RDA) | Permutation test      | Expl. Var. (RDA) | Permutation test        | Mantel cor, p   |
| <b>16S (all OTUs)</b> | 23.2%            | Pseudo-F: 1.2, p<0.01 | 3.1%             | Pseudo-F: 1.1, p = 0.22 | -0.23, p = 0.84 |
| <b>18S (all OTUs)</b> | 24.5%            | Pseudo-F: 1.2, p<0.01 | 3.2%             | Pseudo-F: 1.1, p = 0.27 | 0.04, p = 0.42  |
| <b>Fungi</b>          | 26.2%            | Pseudo-F: 1.3, p<0.01 | 3.4%             | Pseudo-F: 1.1, p = 0.21 | 0.39, p < 0.05  |
| <b>Protists</b>       | 23.9%            | Pseudo-F: 1.2, p<0.01 | 3.1%             | Pseudo-F: 1.0, p = 0.44 | -0.09, p = 0.63 |
| <b>Nematodes</b>      | 28.2%            | Pseudo-F: 1.5, p<0.01 | 3.8%             | Pseudo-F: 1.3, p = 0.16 | 0.10, p = 0.31  |

**Supplementary Table 2: Origin of *Geranium* seeds used in the present study.** Latitude and longitudes, as well as municipality names of all the collection sites. All sites are located in The Netherlands.

| Species                       | Location population | Latitude  | Longitude |
|-------------------------------|---------------------|-----------|-----------|
| <i>Geranium pyrenaicum</i>    | Groesbeek           | 51.778294 | 5.92699   |
| <i>Geranium molle</i>         | Wageningen          | 51.959453 | 5.65838   |
| <i>Geranium dissectum</i>     | Wageningen          | 51.959453 | 5.65838   |
| <i>Geranium pusillum</i>      | Wageningen          | 51.960901 | 5.655526  |
| <i>Geranium rotundifolium</i> | Wageningen          | 51.965554 | 5.67321   |
| <i>Geranium purpureum</i>     | Leiden              | 52.14441  | 4.499412  |
| <i>Geranium robertianum</i>   | Wageningen          | 51.965897 | 5.677823  |
| <i>Geranium lucidum</i>       | Amersfoort          | 52.178606 | 5.38548   |

**Supplementary Table 3: Ellenberg indicator values for eight *Geranium* species.** Ellenberg values (scaled from 1 to 9) indicate species preferences for light, moisture, pH and nitrogen conditions (based on: Hill *et al* (1999)). Conditions associated with the values are given in brackets (low numbers-high numbers).

|                         | Light<br>(shaded-light) | Moisture<br>(dry-wet) | Reaction<br>(acidic-alkaline) | Nitrogen<br>(low-high) |
|-------------------------|-------------------------|-----------------------|-------------------------------|------------------------|
| <i>G. dissectum</i>     | 7                       | 5                     | 7                             | 6                      |
| <i>G. lucidum</i>       | 6                       | 4                     | 7                             | 6                      |
| <i>G. molle</i>         | 7                       | 5                     | 6                             | 5                      |
| <i>G. purpureum</i>     | 7                       | 3                     | 6                             | 3                      |
| <i>G. pusillum</i>      | 7                       | 4                     | 7                             | 7                      |
| <i>G. pyrenaicum</i>    | 8                       | 4                     | 7                             | 6                      |
| <i>G. robertianum</i>   | 5                       | 6                     | 6                             | 6                      |
| <i>G. rotundifolium</i> | 7                       | 4                     | 7                             | 6                      |

**Supplementary Table 4: Collection locations of independent replicate soils.** Latitude and longitudes, as well as municipality names of all the collection sites of the 5 soil inocula, used as independent replicates in the plant-soil feedback experiment.

| Soil replicate | Location   | Latitude | Longitude |
|----------------|------------|----------|-----------|
| 1              | Rhenen     | 51.95284 | 5.580714  |
| 2              | Rhenen     | 51.95383 | 5.607912  |
| 3              | Wageningen | 51.9595  | 5.658224  |
| 4              | Wageningen | 51.96475 | 5.681148  |
| 5              | Renkum     | 51.97078 | 5.736912  |

**Supplementary Table 5: Overview of replicate numbers for rhizosphere community sequencing.** Total number of successfully sequenced replicate communities are shown for sequencing of eukaryotes (18S rRNA gene) and prokaryotes (16S rRNA gene).

| Species                       | Replicates | Replicates |
|-------------------------------|------------|------------|
|                               | 18S        | 16S        |
| <i>Geranium dissectum</i>     | 5          | 5          |
| <i>Geranium lucidum</i>       | 5          | 5          |
| <i>Geranium molle</i>         | 4          | 5          |
| <i>Geranium purpureum</i>     | 4          | 5          |
| <i>Geranium pusillum</i>      | 5          | 5          |
| <i>Geranium pyrenaicum</i>    | 5          | 5          |
| <i>Geranium robertianum</i>   | 5          | 5          |
| <i>Geranium rotundifolium</i> | 5          | 5          |

**Supplementary Table 6: Functional group assignment.** Overview of microbial and nematode taxa assigned to functional groups (root-feeding nematodes, plant pathogens, arbuscular mycorrhizal fungi). Numbers of OTU's of each taxa are shown.

| Functional group             | Taxon                            | Number of OTU's |
|------------------------------|----------------------------------|-----------------|
| Root-feeding nematodes       | <i>Boleodorus</i>                | 1               |
| Root-feeding nematodes       | <i>Meloidogyne</i>               | 3               |
| Root-feeding nematodes       | <i>Mesocriconema</i>             | 1               |
| Fungal plant pathogen        | <i>Rhizoctonia</i>               | 1               |
| Protist plant pathogen       | <i>Pythium</i>                   | 3               |
| Protist plant pathogen       | <i>Haptoglossa</i>               | 1               |
| Protist plant pathogen       | Oomycota unspecified             | 8               |
| Protist plant pathogen       | <i>Polymyxa</i>                  | 3               |
| Protist plant pathogen       | <i>Spongospora</i>               | 3               |
| Protist plant pathogen       | Plasmodiophorida unspecified     | 2               |
| Arbuscular mycorrhizal fungi | <i>Glomeromycota unspecified</i> | 15              |
| Arbuscular mycorrhizal fungi | <i>Glomus</i>                    | 21              |
| Arbuscular mycorrhizal fungi | <i>Ambispora</i>                 | 1               |
| Arbuscular mycorrhizal fungi | <i>Diversispora</i>              | 1               |
